# Supplementary material for: Conformational preferences of modified nucleobases in RNA aptamers and their effect on Förster resonant energy transfer
Source: Royal Society of Chemistry journal article supplement (doi:10.1039/d3cp04704k), 2023-11-24
Supplement: d3cp04704k1.pdf [file d3cp04704k1.pdf]

# Supporting Information: Conformational Properties of Modified Nucleobases in RNA Aptamers and their Effect on Förster Resonant Energy Transfer

David Fischermeier,<sup>\*,†</sup> Christian Steinmetzger,<sup>‡</sup> Claudia Höbartner,<sup>‡</sup> and Roland  
Mitrić<sup>†</sup>

<sup>†</sup>*Institut für Physikalische und Theoretische Chemie, Universität Würzburg, Am Hubland,  
97074 Würzburg, Germany*

<sup>‡</sup>*Institut für Organische Chemie, Universität Würzburg, Am Hubland, 97074 Würzburg,  
Germany.*

E-mail: david.fischermeier@gmail.com

# Molecular Dynamics Parameters

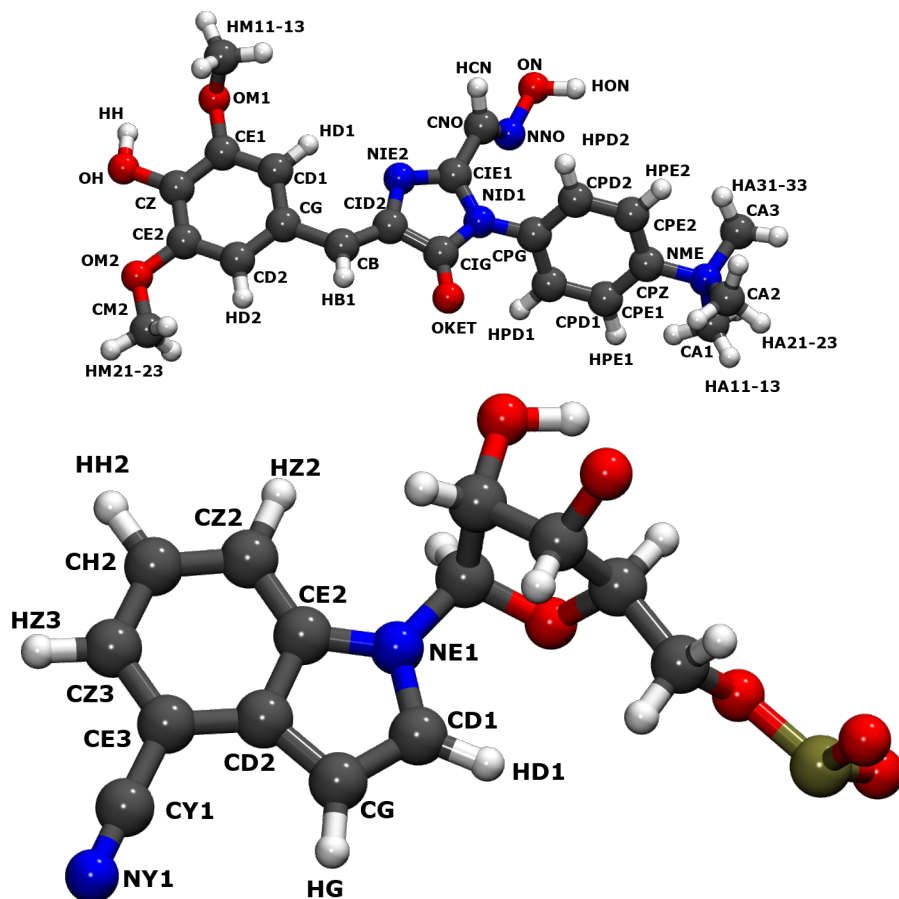

Figure 1: Depiction of the atom name assignment of DMHBO<sup>+</sup> (top) and r4CI (bottom) for the forcefield parameters.

The parameters used for DMHBO<sup>+</sup> and r4CI we utilized are as follows:

## DMHBO<sup>+</sup> and r4CI CHARMM36 Parameters

---

```

! r4CI (CYRI) residue
RESI CYRI      -1.00 ! CYRI C8H7N indole , adm jr., atm
ATOM P      P      1.50
ATOM O1P    ON3    -0.78
ATOM O2P    ON3    -0.78
ATOM O5'    ON2    -0.57
ATOM C5'    CN8B   -0.08
ATOM H5'    HN8     0.09
ATOM H5''   HN8     0.09
GROUP
ATOM C4'    CN7     0.16
ATOM H4'    HN7     0.09
ATOM O4'    ON6B   -0.50
ATOM C1'    CN7B    0.16
    
```

|                                       |        |         |     |        |        |      |        |        |           |
|---------------------------------------|--------|---------|-----|--------|--------|------|--------|--------|-----------|
| ATOM H1'                              | HN7    | 0.09    |     |        |        |      |        |        |           |
| ATOM C3'                              | CN7    | 0.01    |     |        |        |      |        |        |           |
| ATOM H3'                              | HN7    | 0.09    |     |        |        |      |        |        |           |
| ATOM O3'                              | ON2    | -0.57   |     |        |        |      |        |        |           |
| ATOM C2'                              | CN7B   | 0.14    |     |        |        |      |        |        |           |
| ATOM H2''                             | HN7    | 0.09    |     |        |        |      |        |        |           |
| ATOM O2'                              | ON5    | -0.66   |     |        |        |      |        |        |           |
| ATOM H2'                              | HN5    | 0.43    |     |        |        |      |        |        |           |
| GROUP                                 |        |         |     |        |        |      |        |        |           |
| ATOM HG                               | HGR51  | 0.1641  | !   | 0.14   | !      |      |        |        | CY1 - NY1 |
| ATOM CG                               | CG2R51 | -0.3119 | !   | -0.17  | !      |      |        |        |           |
| ATOM CD2                              | CG2RC0 | 0.4834  | !   | 0.11   | !      | HG   |        | CE3    |           |
| ATOM CD1                              | CG2R51 | -0.7254 | !   | -0.15  | !      |      | \      | / \ \  |           |
| ATOM HD1                              | HGR52  | 0.5450  | !   | 0.22   | !      |      | CG——   | CD2    | CZ3-HZ3   |
| ATOM NE1                              | NG2R51 | 0.8213  | !   | -0.51  | !      |      |        |        |           |
| !TOM HE1                              | HGP1   | 123     | !   | 0.37   | !      | CD1  |        | CE2    | CH2-HH2   |
| ATOM CE2                              | CG2RC0 | -0.7012 | !   | 0.24   | !      |      | /      | \      | / \ //    |
| ATOM CE3                              | CG2R61 | -0.2905 | !   | -0.25  | !      | HD1  |        | NE1    | CZ2       |
| !TOM HE3                              | HGR61  | 123     | !   | 0.17   | !      |      |        |        |           |
| ATOM CZ2                              | CG2R61 | 0.0012  | !   | -0.27  | !      |      |        | C1'    | HZ2       |
| ATOM HZ2                              | HGR61  | 0.1117  | !   | 0.16   |        |      |        |        |           |
| ATOM CZ3                              | CG2R61 | 0.0119  | !   | -0.20  |        |      |        |        |           |
| ATOM HZ3                              | HGR61  | 0.0910  | !   | 0.14   |        |      |        |        |           |
| ATOM CH2                              | CG2R61 | -0.1920 | !   | -0.14  |        |      |        |        |           |
| ATOM HH2                              | HGR61  | 0.0875  | !   | 0.14   |        |      |        |        |           |
| ATOM CY1                              | CG1N1  | 0.4464  | !   | 0.39   |        |      |        |        |           |
| ATOM NY1                              | NG1T1  | -0.5426 | !   | -0.47  |        |      |        |        |           |
| BOND P O1P                            |        |         |     |        |        |      |        |        |           |
| BOND P O2P                            |        |         |     |        |        |      |        |        |           |
| BOND P O5'                            |        |         |     |        |        |      |        |        |           |
| BOND C5' O5'                          |        |         |     |        |        |      |        |        |           |
| BOND C5' H5'                          |        |         |     |        |        |      |        |        |           |
| BOND C5' H5''                         |        |         |     |        |        |      |        |        |           |
| BOND C5' C4'                          |        |         |     |        |        |      |        |        |           |
| BOND C4' H4'                          |        |         |     |        |        |      |        |        |           |
| BOND C4' O4'                          |        |         |     |        |        |      |        |        |           |
| BOND C4' C3'                          |        |         |     |        |        |      |        |        |           |
| BOND C3' O3'                          |        |         |     |        |        |      |        |        |           |
| BOND C3' H3'                          |        |         |     |        |        |      |        |        |           |
| BOND C3' C2'                          |        |         |     |        |        |      |        |        |           |
| BOND C2' C1'                          |        |         |     |        |        |      |        |        |           |
| BOND C2' H2''                         |        |         |     |        |        |      |        |        |           |
| BOND C2' O2'                          |        |         |     |        |        |      |        |        |           |
| BOND O2' H2'                          |        |         |     |        |        |      |        |        |           |
| BOND C1' H1'                          |        |         |     |        |        |      |        |        |           |
| BOND C1' O4'                          |        |         |     |        |        |      |        |        |           |
| BOND C1' NE1                          |        |         |     |        |        |      |        |        |           |
| BOND NY1 CY1                          |        |         |     |        |        |      |        |        |           |
| BOND CY1 CE3                          |        |         |     |        |        |      |        |        |           |
| BOND CG HG CD2 CG NE1 CD1             |        |         |     |        |        |      |        |        |           |
| BOND CZ2 CE2                          |        |         |     |        |        |      |        |        |           |
| BOND CZ3 CH2 CD2 CE3 NE1 CE2          |        |         |     |        |        |      |        |        |           |
| BOND CD1 HD1                          |        |         |     |        |        |      |        |        |           |
| BOND CZ3 HZ3 CH2 HH2 CZ2 HZ2          |        |         |     |        |        |      |        |        |           |
| DOUBLE CD1 CG CE2 CD2 CH2 CZ2 CZ3 CE3 |        |         |     |        |        |      |        |        |           |
| IC CG                                 | CD1    | NE1     | CE2 | 1.3650 | 110.50 | 0.00 | 112.00 | 1.3700 |           |

|        |     |      |     |        |        |        |        |        |
|--------|-----|------|-----|--------|--------|--------|--------|--------|
| IC CD1 | CG  | CD2  | CE2 | 1.3650 | 106.40 | 0.00   | 108.00 | 1.3850 |
| IC CD2 | CG  | CD1  | NE1 | 1.4300 | 106.40 | 0.00   | 110.50 | 1.3700 |
| IC CE2 | CG  | *CD2 | CE3 | 1.3850 | 108.00 | 180.00 | 133.50 | 1.3600 |
| IC CE2 | CD2 | CE3  | CZ3 | 1.3850 | 110.00 | 0.00   | 113.20 | 1.3750 |
| IC CD2 | CE3 | CZ3  | CH2 | 1.3600 | 113.20 | 0.00   | 120.00 | 1.3750 |
| IC CE3 | CZ3 | CH2  | CZ2 | 1.3750 | 120.00 | 0.00   | 120.00 | 1.3750 |
| IC CH2 | CE3 | *CZ3 | HZ3 | 1.3750 | 120.00 | 180.00 | 120.00 | 1.0800 |
| IC CZ2 | CZ3 | *CH2 | HH2 | 1.3750 | 120.00 | 180.00 | 120.00 | 1.0800 |
| IC CE2 | CH2 | *CZ2 | HZ2 | 1.3600 | 113.20 | 180.00 | 120.00 | 1.0800 |
| IC CD1 | CE2 | *NE1 | HE1 | 1.3700 | 112.00 | 180.00 | 126.00 | 0.9760 |
| IC CG  | NE1 | *CD1 | HD1 | 1.3650 | 110.50 | 180.00 | 125.00 | 1.0800 |
| IC CD1 | CD2 | *CG  | HG  | 1.3650 | 106.40 | 180.00 | 126.40 | 1.0800 |

PATCH FIRST NONE LAST NONE

! DMHBO+ (HBO) residue

RESI HBO 1.00 ! HBO

GROUP

|           |        |         |
|-----------|--------|---------|
| ATOM CG   | CG2R61 | 0.3153  |
| ATOM CD1  | CG2R61 | -0.6582 |
| ATOM HD1  | HGR61  | 0.2757  |
| ATOM CD2  | CG2R61 | -0.6126 |
| ATOM HD2  | HGR61  | 0.2420  |
| ATOM CE1  | CG2R61 | 0.6210  |
| ATOM OM1  | OG301  | -0.34   |
| ATOM CM1  | CG331  | -0.10   |
| ATOM HM11 | HGA3   | 0.09    |
| ATOM HM12 | HGA3   | 0.09    |
| ATOM HM13 | HGA3   | 0.09    |

GROUP

|           |        |        |
|-----------|--------|--------|
| ATOM CE2  | CG2R61 | 0.6210 |
| ATOM OM2  | OG301  | -0.34  |
| ATOM CM2  | CG331  | -0.10  |
| ATOM HM21 | HGA3   | 0.09   |
| ATOM HM22 | HGA3   | 0.09   |
| ATOM HM23 | HGA3   | 0.09   |

GROUP

|         |        |         |
|---------|--------|---------|
| ATOM CZ | CG2R61 | -0.1850 |
| ATOM OH | OG311  | -0.4514 |
| ATOM HH | HGP1   | 0.3811  |

GROUP

|          |        |         |
|----------|--------|---------|
| ATOM CB  | CG2DC3 | -0.1149 |
| ATOM HB1 | HGA4   | 0.1209  |

GROUP ! IMIDAZOLE MEOI MRDN

|           |        |         |
|-----------|--------|---------|
| ATOM CIG  | CG2R53 | 0.3870  |
| ATOM CID2 | CG25C2 | 0.2205  |
| ATOM NID1 | NG2R51 | 0.0090  |
| ATOM CIE1 | CG2R53 | 0.0665  |
| ATOM CNO  | CG2DC1 | 0.3871  |
| ATOM NIE2 | NG2R50 | -0.4958 |
| ATOM HCN  | HGA4   | 0.0749  |

GROUP

|           |       |         |
|-----------|-------|---------|
| ATOM NNO  | NG2D1 | -0.2959 |
| ATOM ON   | OG311 | -0.4298 |
| ATOM HON  | HGP1  | 0.4011  |
| ATOM OKET | OG2D1 | -0.5494 |

GROUP ! PARA BENZ



ATOM CPG CG2R61 0.1874  
 ATOM CPD1 CG2R61 -0.1126  
 ATOM HPD1 HGR61 0.1751  
 ATOM CPD2 CG2R61 -0.3046  
 ATOM HPD2 HGR61 0.2406  
 ATOM CPE1 CG2R61 -0.4905  
 ATOM HPE1 HGR61 0.2234  
 ATOM CPE2 CG2R61 -0.2023  
 ATOM HPE2 HGR61 0.1214  
 ATOM CPZ CG2R61 0.8129

GROUP ! NME4

ATOM NME NG3P0 -0.8406  
 ATOM CA1 CG334 -0.35 !  
 ATOM CA2 CG334 -0.35 !  
 ATOM CA3 CG334 -0.35 !  
 ATOM HA11 HGP5 0.25 !  
 ATOM HA12 HGP5 0.25 !  
 ATOM HA13 HGP5 0.25 !  
 ATOM HA21 HGP5 0.25 !  
 ATOM HA22 HGP5 0.25 !  
 ATOM HA23 HGP5 0.25 !  
 ATOM HA31 HGP5 0.25  
 ATOM HA32 HGP5 0.25  
 ATOM HA33 HGP5 0.25

FIRST NONE LAST NONE

! TRI-OXY BENZENE

BOND CD2 CG CE1 CD1

BOND CZ CE2

BOND CD1 HD1

BOND CZ OH OH HH

BOND CD2 HD2

BOND CE1 OM1 OM1 CM1 CM1 HM11 CM1 HM12 CM1 HM13

BOND CE2 OM2 OM2 CM2 CM2 HM21 CM2 HM22 CM2 HM23

BOND CG CB

BOND CB HB1

DOUBLE CD1 CG CE2 CD2 CZ CE1

! IMIDAZOLE

BOND NIE2 CID2 NID1 CIG CIE1 NID1

DOUBLE NIE2 CIE1 CID2 CIG

DOUBLE CIG OKET

BOND NID1 CPG CIE1 CNO

BOND CNO NNO CNO HCN

BOND NNO ON ON HON

BOND CID2 CB

! PARA BENZENE

BOND CPD1 CPG CPD2 CPG CPE1 CPD1

BOND CPE2 CPD2 CPZ CPE1 CPZ CPE2

BOND CPD1 HPD1 CPD2 HPD2 CPE1 HPE1

BOND CPE2 HPE2 CPZ NME

! NME4

BOND NME CA1 NME CA2 NME CA3

BOND CA1 HA11 CA1 HA12 CA1 HA13

BOND CA2 HA21 CA2 HA22 CA2 HA23

BOND CA3 HA31 CA3 HA32 CA3 HA33

```

BONDS
!V(bond) = Kb(b - b0)**2
!
!Kb: kcal/mole/A**2
!b0: A
!
!atom type Kb b0
!
! HBO (DMHBO+)
! Type1 Type2 Kb b0
CG2R61 CG2DC3 340.270 1.421 !
CG2DC3 HGA4 321.794 1.117 !
CG25C2 NG2R50 137.916 1.378 !
CG2R53 CG2DC1 293.670 1.448 !
NG2D1 OG311 356.882 1.361 !
CG2R61 NG3P0 276.667 1.481 !

! CYRI (r4CI)
CN7B NG2R51 220.000 1.456 ! ! CN7B NN2 220.0 1.456

ANGLES
!
!V(angle) = Ktheta(Theta - Theta0)**2
!
!V(Urey-Bradley) = Kub(S - S0)**2
!
!Ktheta: kcal/mole/rad**2
!Theta0: degrees
!Kub: kcal/mole/A**2 (Urey-Bradley)
!S0: A
!
!atom types Ktheta Theta0 Kub S0
!
! HBO (DMHBO+)
CG2R61 CG2DC3 CG25C2 102.947 128.268 !
CG2R61 CG2DC3 HGA4 51.029 115.926 !
CG2R61 CG2R61 CG2DC3 56.566 122.760 !
HGA4 CG2DC3 CG25C2 77.790 111.974 !
CG2R53 NG2R51 CG2R61 60.465 129.532 !
CG2R53 NG2R51 CG2R53 153.217 109.122 !
CG25C2 NG2R50 CG2R53 179.157 108.264 !
NG2R51 CG2R53 CG2DC1 71.071 127.431 !
CG2R53 CG2DC1 HGA4 80.180 115.865 !
CG2R53 CG2DC1 NG2D1 73.720 123.425 !
CG2DC1 NG2D1 OG311 122.588 111.135 !
CG2DC1 CG2R53 NG2R50 115.218 119.191 !
CG2DC3 CG25C2 NG2R50 98.430 129.298 !
CG2R53 CG25C2 NG2R50 264.817 109.292 !
NG2D1 OG311 HGP1 97.338 104.071 !
CG2R61 CG2R61 NG3P0 37.372 118.552 !
CG2R61 NG3P0 CG334 91.377 109.518 !

! CYRI (r4CI)
NG2R51 CN7B ON6B 110.000 112.000 ! ! ON6B CN7B NN2 110.0 112.0
CG2RC0 NG2R51 CN7B 45.000 126.100 ! ! (CE2)CN5 NN2 C7NB 45.0 126.1
CG2R51 NG2R51 CN7B 45.000 127.600 ! ! (CD1)CN4 NN2 C7NB 45.0 127.6

```

|       |        |        |         |         |    |       |        |        |       |        |
|-------|--------|--------|---------|---------|----|-------|--------|--------|-------|--------|
| HN7   | CN7B   | NG2R51 | 43.000  | 111.000 | !! | HN7   | CN7B   | NN2    | 43.0  | 111.0  |
| CN7B  | CN7B   | NG2R51 | 110.000 | 111.000 | !! | CN7B  | CN7B   | NN2    | 110.0 | 111.0  |
| CG1N1 | CG2R61 | CG2RC0 | 35.000  | 120.000 | !! | CG1N1 | CG2R61 | CG2R61 | 35.00 | 120.00 |

! dummies for linking/terminating

|     |     |     |      |
|-----|-----|-----|------|
| HN5 | ON5 | HN5 | 00 0 |
| ON5 | HN5 | ON5 | 00 0 |
| P   | ON2 | P   | 00 0 |

DIHEDRALS

!  
!V(dihedral) = Kchi(1 + cos(n(chi) - delta))

!  
!Kchi: kcal/mole

!n: multiplicity

!delta: degrees

!

| !atom types |  | Kchi | n | delta |
|-------------|--|------|---|-------|
|-------------|--|------|---|-------|

!

! HBO (DMHBO+)

|        |        |        |        |        |   |        |   |
|--------|--------|--------|--------|--------|---|--------|---|
| NG2R51 | CG2R53 | NG2R50 | CG25C2 | 0.9660 | 2 | 180.00 | ! |
| NG2R51 | CG2R53 | CG25C2 | NG2R50 | 1.0460 | 2 | 180.00 | ! |
| CG25C2 | CG2R53 | NG2R51 | CG2R53 | 1.0260 | 2 | 180.00 | ! |
| HGR61  | CG2R61 | CG2R61 | NG3P0  | 0.9000 | 2 | 180.00 | ! |
| NG2R50 | CG2R53 | CG2DC1 | NG2D1  | 0.9530 | 1 | 180.00 | ! |
| NG2R50 | CG2R53 | CG2DC1 | NG2D1  | 0.9430 | 2 | 180.00 | ! |
| NG2R50 | CG2R53 | CG2DC1 | NG2D1  | 0.9960 | 3 | 180.00 | ! |
| CG2R61 | CG2R61 | CG2DC3 | HGA4   | 0.8790 | 2 | 180.00 | ! |
| NG2R51 | CG2R53 | CG2DC1 | NG2D1  | 1.0150 | 2 | 180.00 | ! |
| NG2R51 | CG2R53 | CG2DC1 | HGA4   | 0.9550 | 2 | 180.00 | ! |
| CG2DC3 | CG2R61 | CG2R61 | CG2R61 | 1.0410 | 2 | 180.00 | ! |
| CG2R61 | NG2R51 | CG2R53 | CG2DC1 | 0.9810 | 2 | 180.00 | ! |
| CG2R61 | CG2R61 | NG3P0  | CG334  | 1.0100 | 2 | 180.00 | ! |
| CG2DC1 | CG2R53 | NG2R50 | CG25C2 | 0.9670 | 2 | 180.00 | ! |
| CG2R61 | CG2DC3 | CG25C2 | NG2R50 | 0.9750 | 2 | 180.00 | ! |
| CG2R61 | CG2DC3 | CG25C2 | CG2R53 | 1.0380 | 2 | 180.00 | ! |
| CG2R53 | NG2R51 | CG2R53 | CG2DC1 | 1.0290 | 2 | 180.00 | ! |
| OG2D1  | CG2R53 | NG2R51 | CG2R53 | 0.9910 | 2 | 180.00 | ! |
| CG2R61 | NG2R51 | CG2R53 | NG2R50 | 0.9440 | 2 | 180.00 | ! |
| CG25C2 | CG2R53 | NG2R51 | CG2R61 | 1.0030 | 2 | 180.00 | ! |
| CG2DC3 | CG25C2 | NG2R50 | CG2R53 | 1.0760 | 2 | 180.00 | ! |
| CG2DC3 | CG2R61 | CG2R61 | HGR61  | 1.0100 | 2 | 180.00 | ! |
| CG2R53 | CG25C2 | NG2R50 | CG2R53 | 1.0280 | 2 | 180.00 | ! |
| CG2R53 | CG2DC1 | NG2D1  | OG311  | 0.9870 | 2 | 180.00 | ! |
| CG2R53 | NG2R51 | CG2R53 | NG2R50 | 1.0460 | 2 | 180.00 | ! |
| CG2DC1 | NG2D1  | OG311  | HGP1   | 1.0130 | 2 | 180.00 | ! |
| NG2R50 | CG2R53 | CG2DC1 | HGA4   | 0.9570 | 2 | 180.00 | ! |
| CG2R61 | NG3P0  | CG334  | HGP5   | 0.9960 | 2 | 180.00 | ! |
| HGA4   | CG2DC3 | CG25C2 | NG2R50 | 0.8620 | 2 | 180.00 | ! |
| HGA4   | CG2DC3 | CG25C2 | CG2R53 | 0.9670 | 2 | 180.00 | ! |
| CG2R61 | CG2R61 | CG2DC3 | CG25C2 | 0.9470 | 2 | 180.00 | ! |
| OG301  | CG2R61 | CG2R61 | OG311  | 0.9710 | 2 | 180.00 | ! |
| OG2D1  | CG2R53 | NG2R51 | CG2R61 | 0.9060 | 2 | 180.00 | ! |
| OG2D1  | CG2R53 | CG25C2 | NG2R50 | 1.0220 | 2 | 180.00 | ! |
| HGA4   | CG2DC1 | NG2D1  | OG311  | 0.9690 | 2 | 180.00 | ! |

```

CG2R61  CG2R61  CG2R61  NG3P0   1.0300   2  180.00  !
CG2R53  NG2R51  CG2R61  CG2R61   1.0000   2  180.00  !

! CYRI (r4CI)
CN7      ON6B    CN7B   NG2R51  0.0      3      0.0  ! CN7  ON6B  CN7B  NN2      0.0      3      0.0
ON6B     CN7B    NG2R51  CG2RC0  1.1      1      180.0 ! ON6B  CN7B  NN2  CN5      1.1      1      180.0 !
ON6B     CN7B    NG2R51  CG2R51  1.1      1      0.0  ! ON6B  CN7B  NN2  CN4      1.1      1      0.0 !
CN7B     NG2R51  CG2RC0  CG2RC0  11.0     2      180.0 ! CN7B  NN2  CN5  CN5      11.0     2      180.0 ! adm jr .
CN7B     NG2R51  CG2RC0  CG2R61  11.0     2      180.0 ! CN7B  NN2  CN5  CN5      11.0     2      180.0 ! adm jr .
CN7B     NG2R51  CG2R51  CG2R51  11.0     2      180.0 ! CN7B  NN2  CN4  NN3A     11.0     2      180.0 ! adm jr .
CN7B     NG2R51  CG2R51  HGR52   0.3      2      180.0 ! CN7B  NN2  CN4  HN3      0.3      2      180.0 ! NF
HN7      CN7B    NG2R51  CG2RC0  0.0      3      0.0  ! HN7  CN7B  NN2  CN5      0.0      3      0.0 ! NF
CN7      CN7B    NG2R51  CG2R51  0.195    3      0.0  ! HN7  CN7B  NN2  CN4      0.195    3      0.0 ! NF
CN7      CN7B    CN7B    NG2R51  0.0      3      0.0  ! CN7  CN7B  CN7B  NN2      0.0      3      0.0
CN7B     CN7B    NG2R51  CG2RC0  0.3      3      0.0  ! CN7B  CN7B  NN2  CN5      0.3      3      0.0 ! NF
CN7B     CN7B    NG2R51  CG2R51  0.0      3      180.0 ! CN7B  CN7B  NN2  CN4      0.0      3      180.0 ! NF
HN7      CN7B    CN7B    NG2R51  0.0      3      0.0  ! HN7  CN7B  CN7B  NN2      0.0      3      0.0
ON5      CN7B    CN7B    NG2R51  0.00     3      0.0  ! NN2  CN7B  CN7B  ON5      0.000    3      0.0 ! Adenine and cytosine
HN7      CN7B    NG2R51  CG2R51  0.195    3      0.0  ! HN7  CN7B  NN2  CN4      0.195    3      0.0 ! NF

CG2R61  CG2R61  CG1N1   NG1T1   0.0000   1  0.00  !
CG2RC0  CG2R61  CG1N1   NG1T1   0.0000   1  0.00  !
CG2R51  CG2RC0  CG2R61  CG1N1   2.9950   2  180.00 !
CG2RC0  CG2RC0  CG2R61  CG1N1   2.9990   2  180.00 !

IMPROPER
!
!V(improper) = Kpsi(psi - psi0)**2
!
!Kpsi: kcal/mole/rad**2
!psi0: degrees
!note that the second column of numbers (0) is ignored
!
!atom types          Kpsi          psi0
!

NONBONDED nbxmod 5 atom cdiel shift vatom vdistance vswitch -
cutnb 14.0 ctofnb 12.0 ctonnb 10.0 eps 1.0 e14fac 1.0 wmin 1.5
!
!V(Lennard-Jones) = Eps,i,j [(Rmin,i,j/ri,j)**12 - 2(Rmin,i,j/ri,j)**6]
!
!epsilon: kcal/mole, Eps,i,j = sqrt(eps,i * eps,j)
!Rmin/2: A, Rmin,i,j = Rmin/2,i + Rmin/2,j
!
!atom ignored      epsilon      Rmin/2      ignored      eps,1-4      Rmin/2,1-4
!

END

```

---

## Initial Orientations

The initial orientations for all simulations is shown in the following. For each species except U23, which does not have an internal orientation, two intrahelical ( $I_{1,2}$ , rotated by  $180^\circ$ ) and three extrahelical ( $E_{1-3}$ ) orientations were constructed. r4CI is highlighted in red, while DMHBO<sup>+</sup> is highlighted in grey.

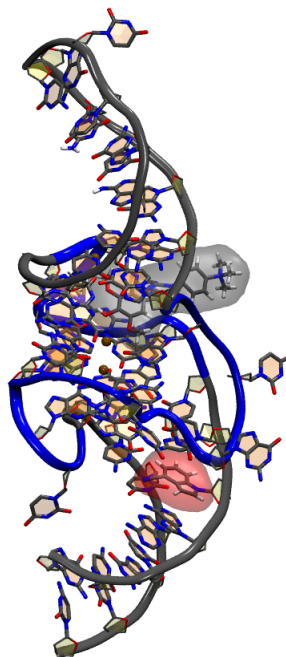

Figure 2:  $I_1$  orientation of the G6 species.

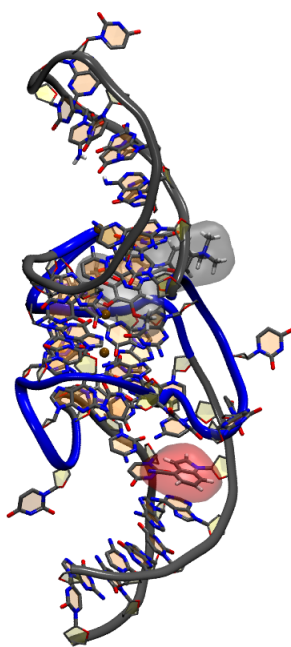

Figure 3:  $I_2$  orientation of the G6 species.

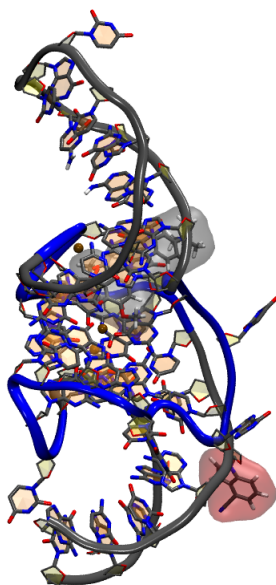

Figure 4:  $E_1$  orientation of the G6 species.

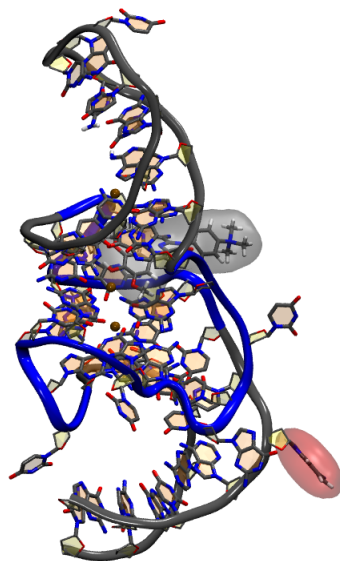

Figure 5:  $E_2$  orientation of the G6 species.

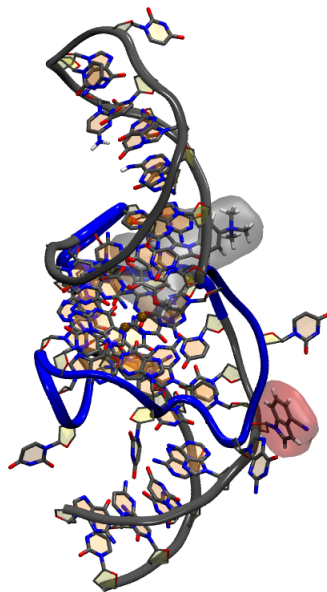

Figure 6:  $E_3$  orientation of the G6 species.

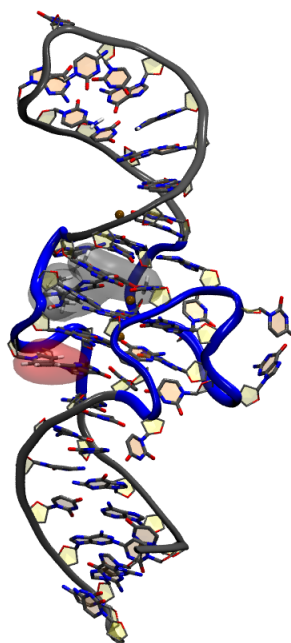

Figure 7:  $I_1$  orientation of the A11 species.

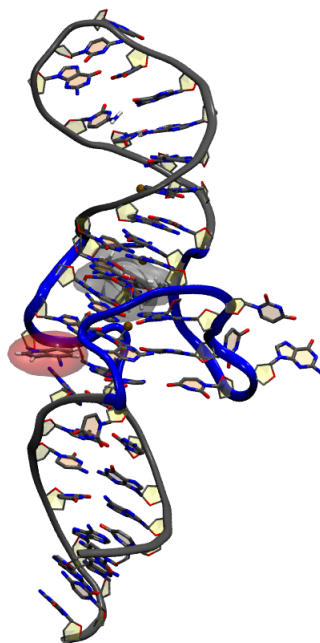

Figure 8:  $I_2$  orientation of the A11 species.



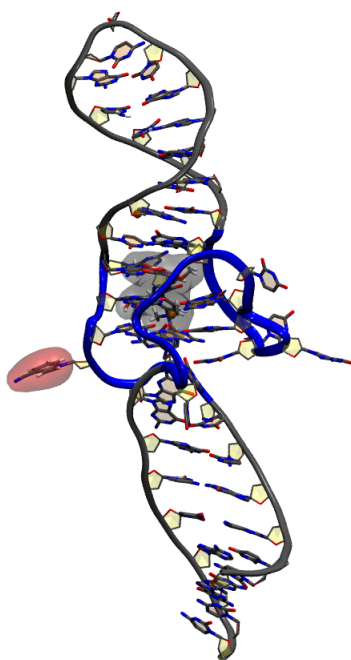

Figure 9:  $E_1$  orientation of the A11 species.

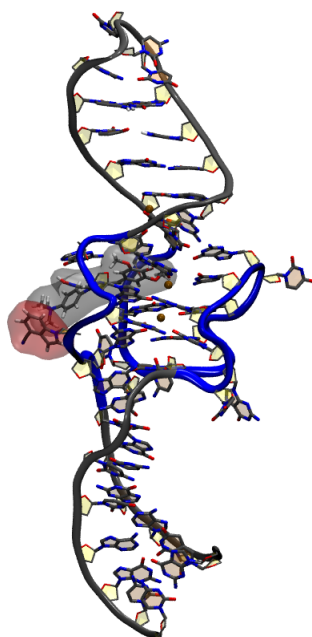

Figure 10:  $E_2$  orientation of the A11 species.

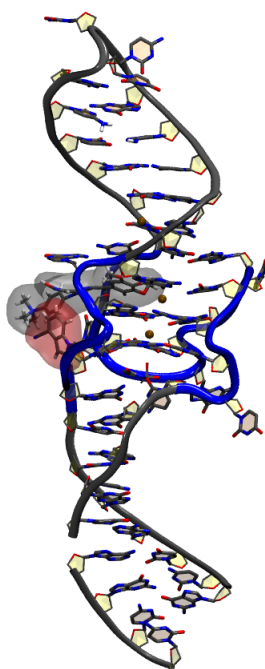

Figure 11:  $E_3$  orientation of the A11 species.

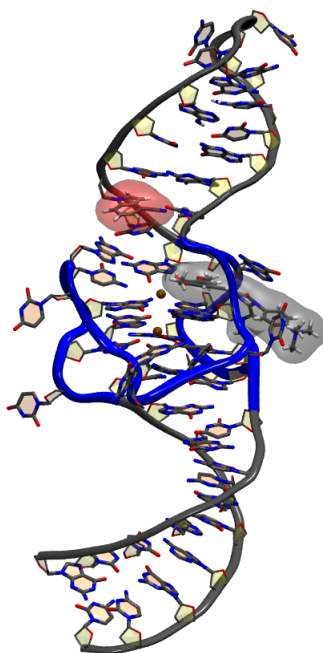

Figure 12:  $I_1$  orientation of the G17 species.

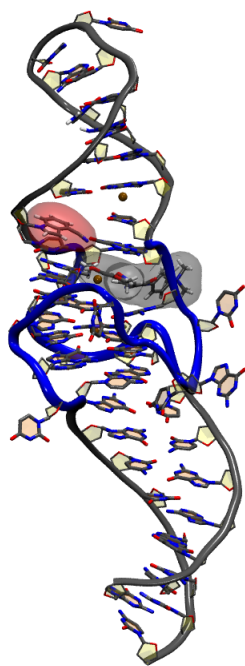

Figure 13:  $I_2$  orientation of the G17 species.

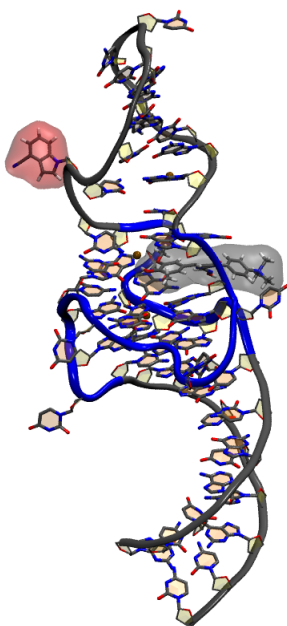

Figure 14:  $E_1$  orientation of the G17 species.

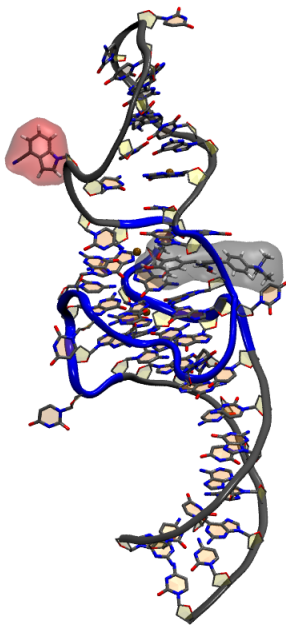

Figure 15:  $E_2$  orientation of the G17 species.

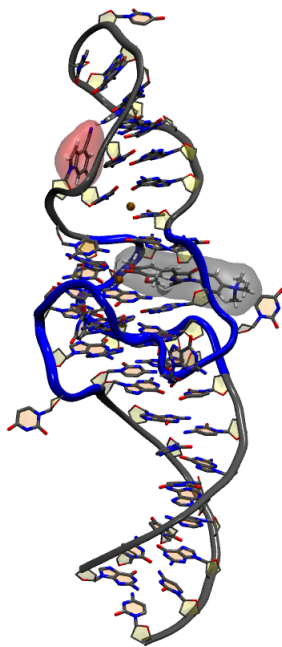

Figure 16:  $E_3$  orientation of the G17 species.

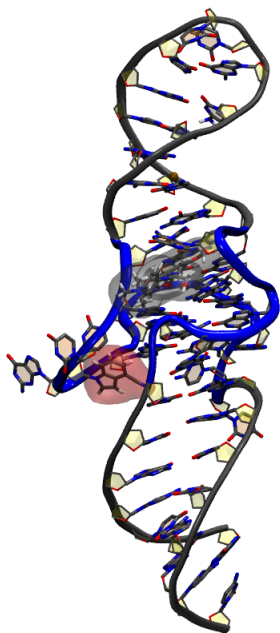

Figure 17:  $I_1$  orientation of the U34 species.

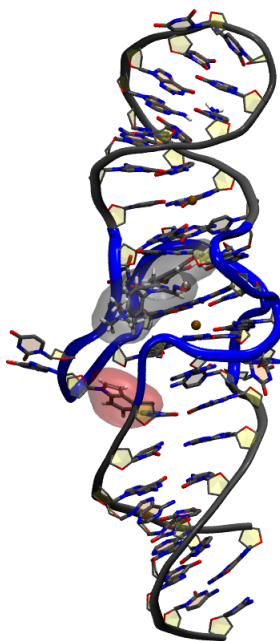

Figure 18:  $I_2$  orientation of the U34 species.

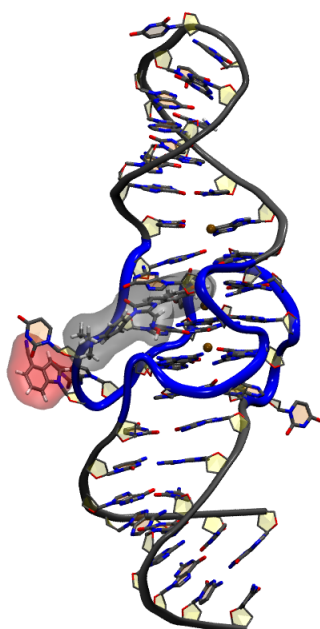

Figure 19:  $E_1$  orientation of the U34 species.

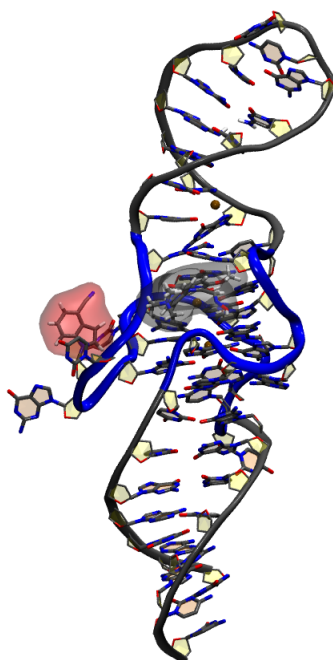

Figure 20:  $E_2$  orientation of the U34 species.

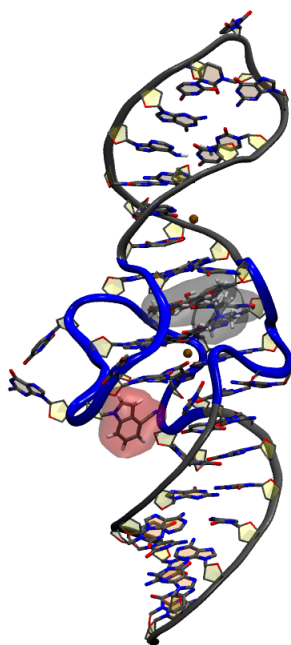

Figure 21:  $E_3$  orientation of the U34 species.

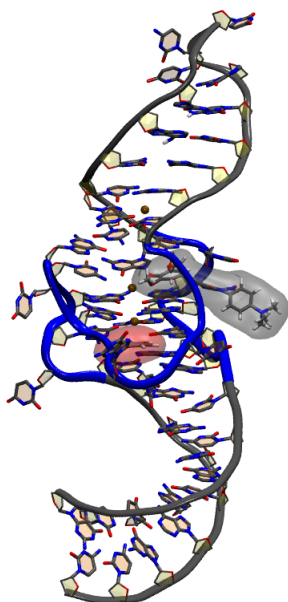

Figure 22:  $I_1$  orientation of the G36 species.

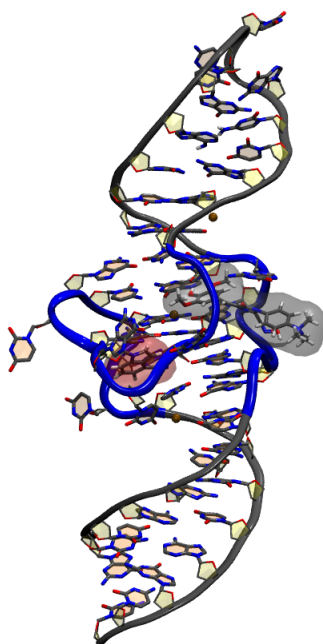

Figure 23:  $I_2$  orientation of the G36 species.

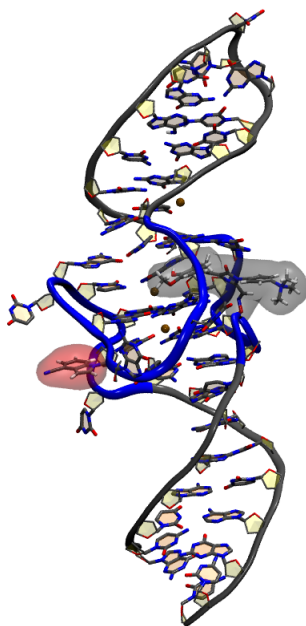

Figure 24:  $E_1$  orientation of the G36 species.



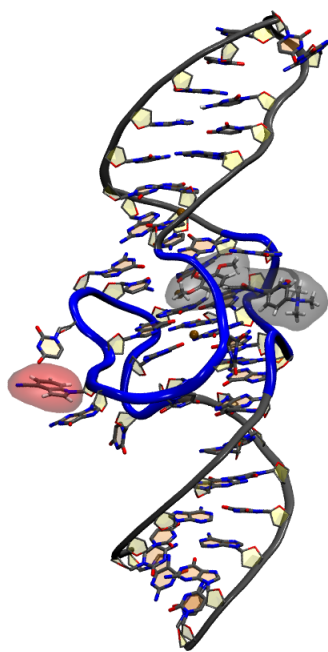

Figure 25:  $E_2$  orientation of the G36 species.

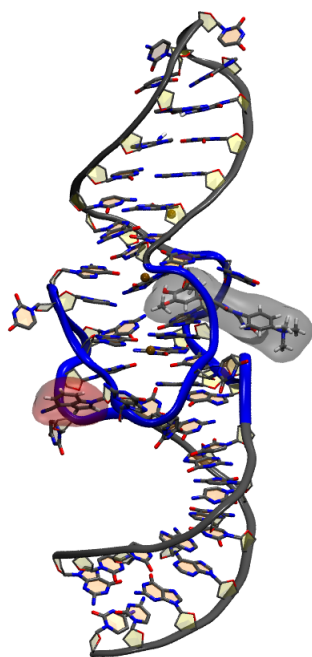

Figure 26:  $E_3$  orientation of the G36 species.

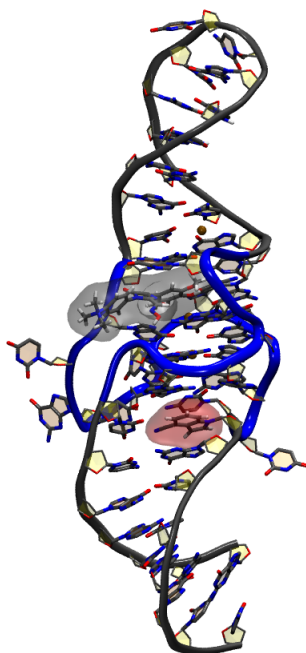

Figure 27:  $I_1$  orientation of the G45 species.

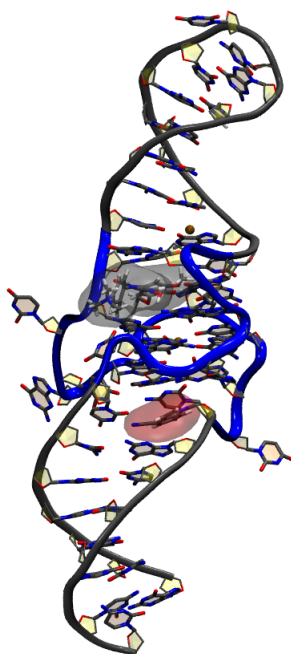

Figure 28:  $I_2$  orientation of the G45 species.

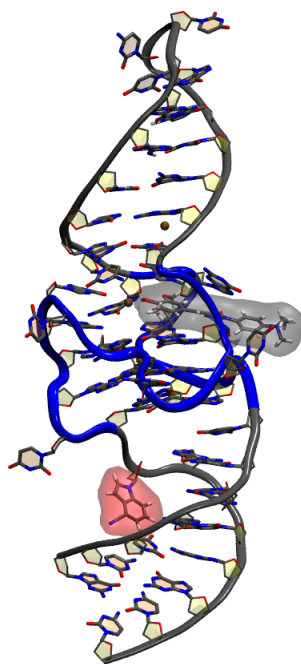

Figure 29:  $E_1$  orientation of the G45 species.

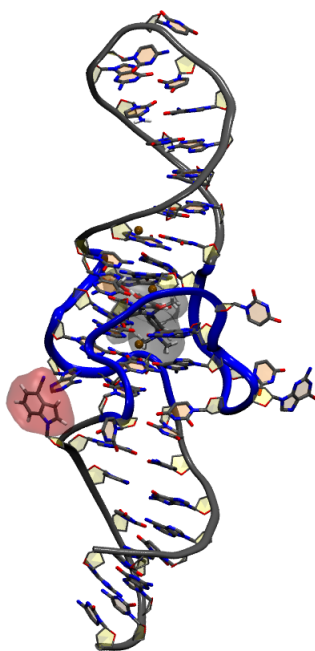

Figure 30:  $E_2$  orientation of the G45 species.

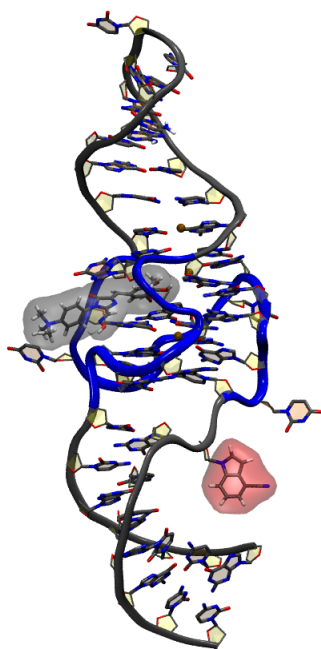

Figure 31:  $E_3$  orientation of the G45 species.

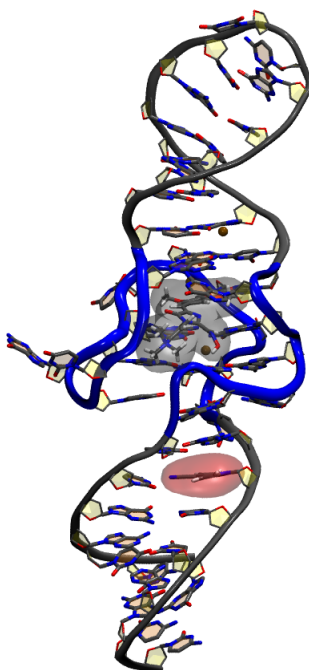

Figure 32:  $I_1$  orientation of the G46 species.

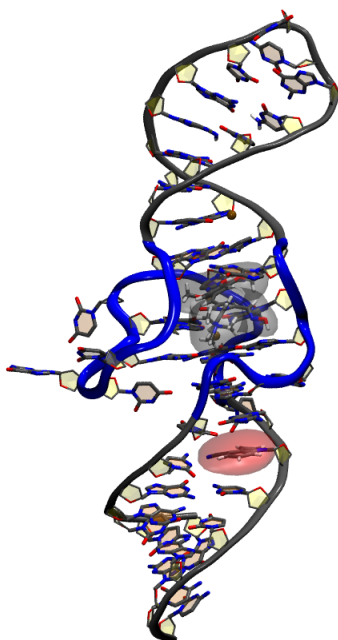

Figure 33:  $I_2$  orientation of the G46 species.

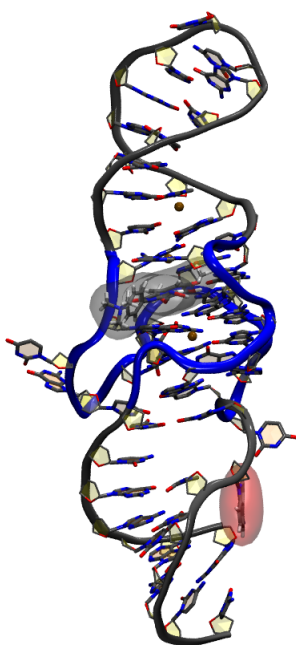

Figure 34:  $E_1$  orientation of the G46 species.

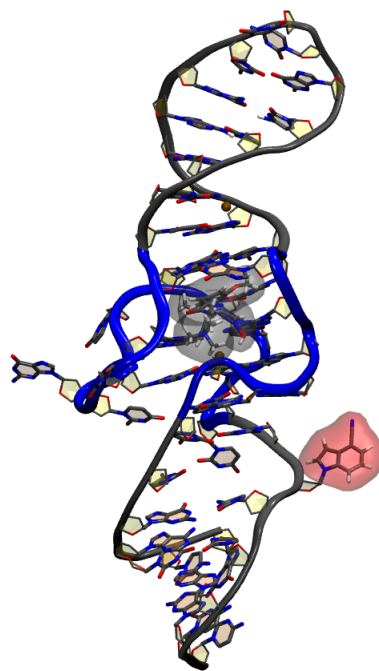

Figure 35:  $E_2$  orientation of the G46 species.

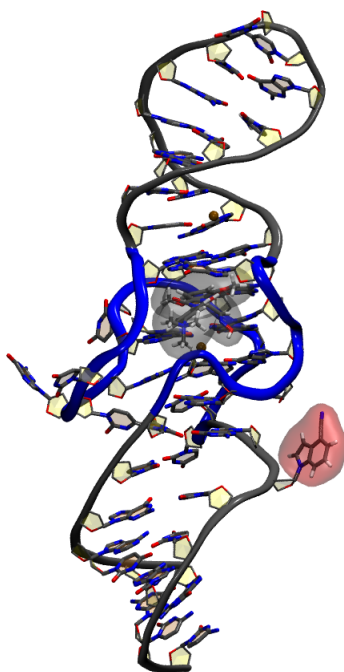

Figure 36:  $E_3$  orientation of the G46 species.

## Simulation stability and convergence of trajectories

The RMSD of the heavy atoms as a prime indicator for simulation stability is given for all simulations in the following. The RMSD of the entire aptamer oscillates around  $5\text{\AA}$  for all simulations. Extrahilical CI exhibits the highest degree of freedom as expected. DMHBO<sup>+</sup> oscillates around  $3\text{\AA}$  and remains inside the binding site at all times during all simulations.

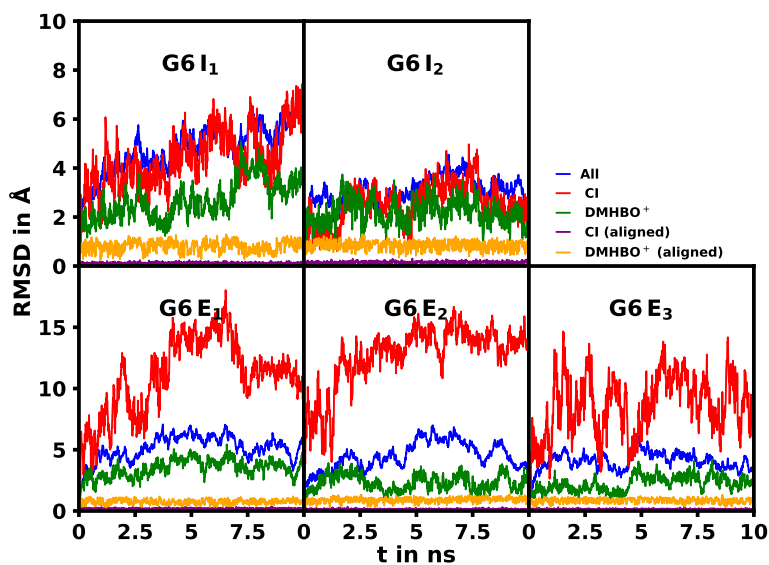

Figure 37: RMSD of the atomic positions in  $\text{\AA}$  of the G6 species simulations.

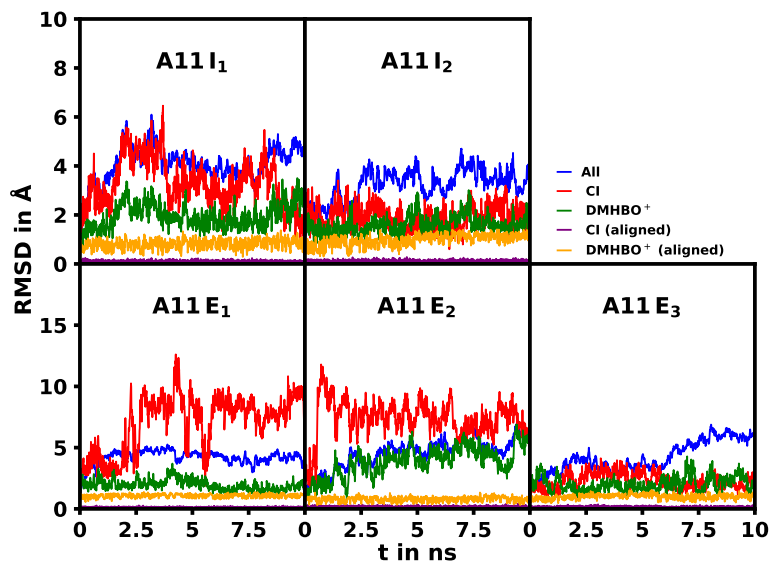

Figure 38: RMSD of the atomic positions in Å of the A11 species simulations.

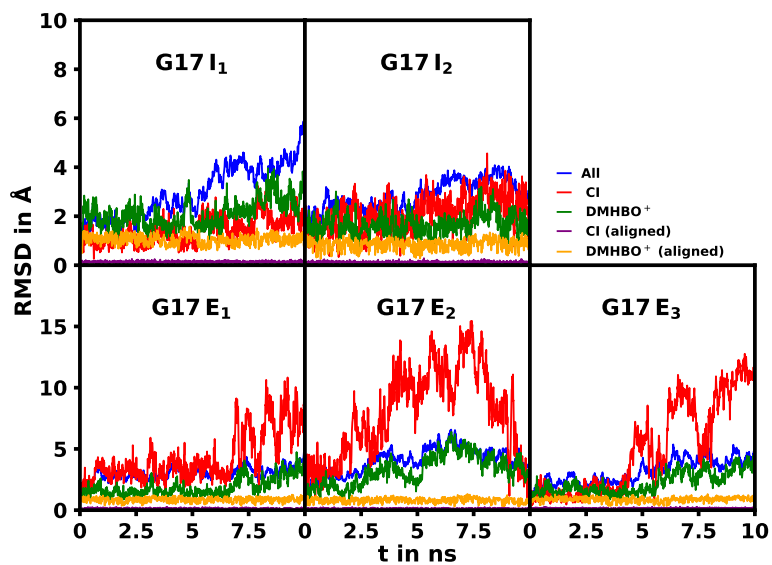

Figure 39: RMSD of the atomic positions in Å of the G17 species simulations.



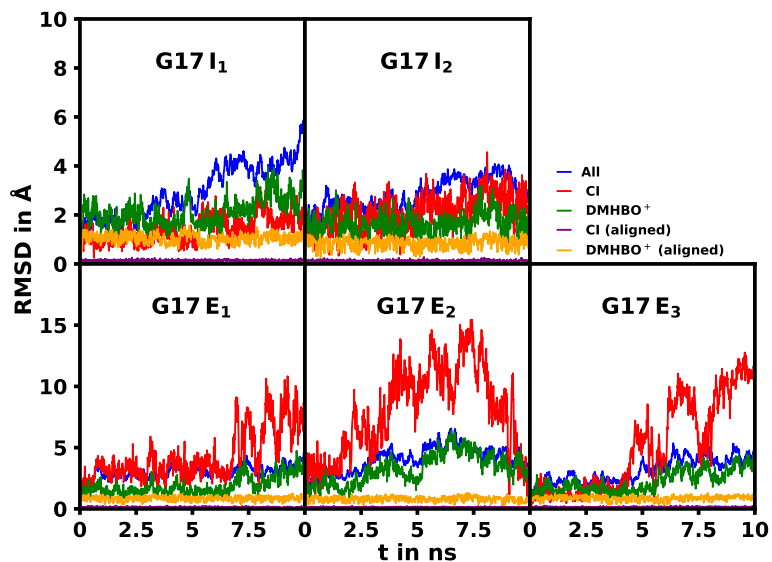

Figure 40: RMSD of the atomic positions in Å of the G17 species simulations.

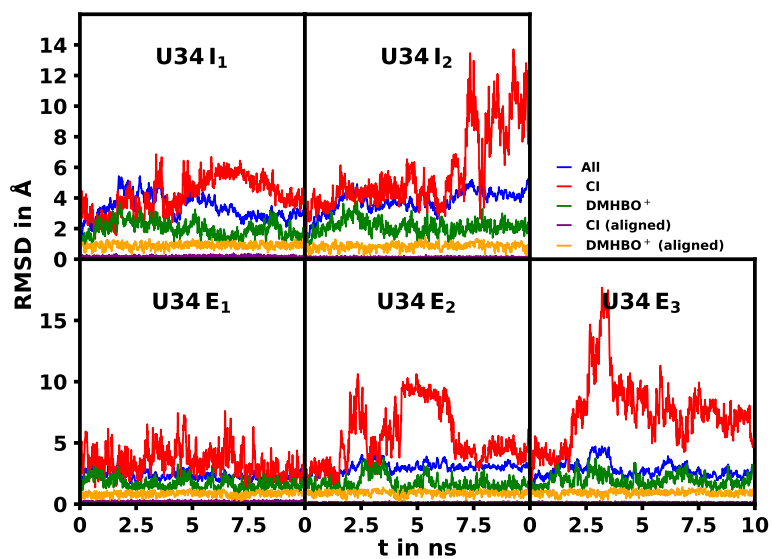

Figure 41: RMSD of the atomic positions in Å of the U34 species simulations.

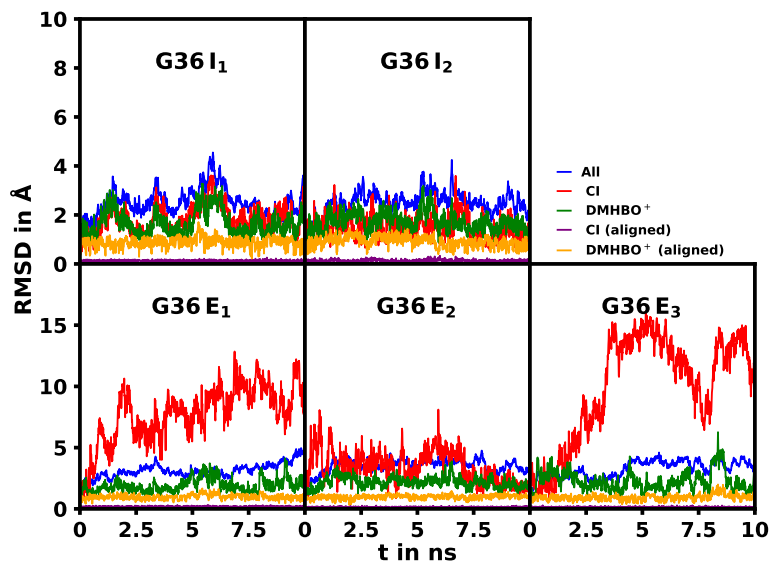

Figure 42: RMSD of the atomic positions in Å of the G36 species simulations.

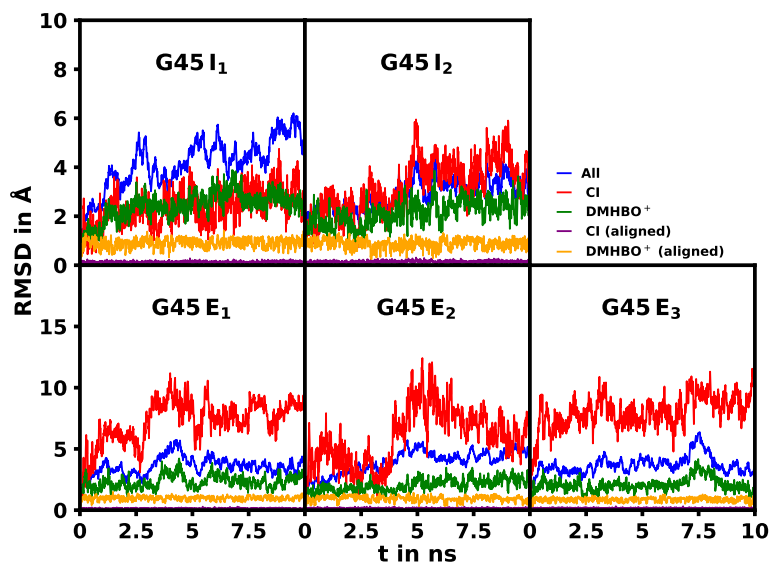

Figure 43: RMSD of the atomic positions in Å of the G45 species simulations.

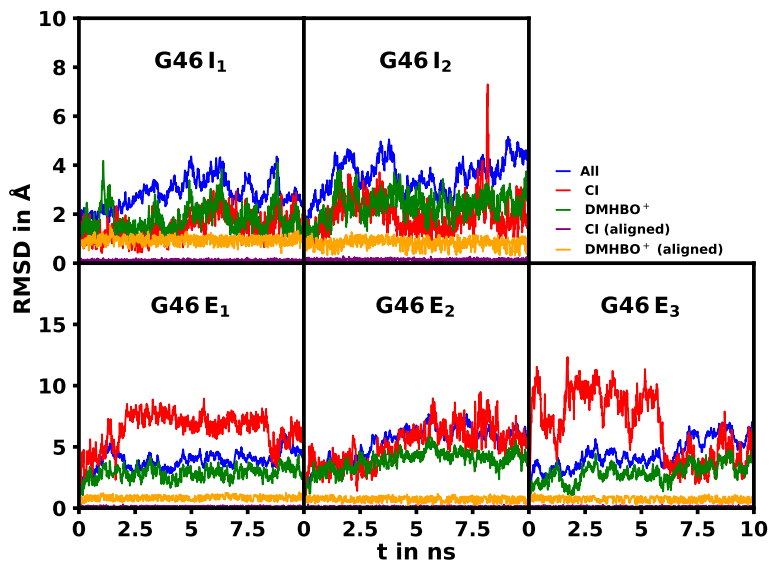

Figure 44: RMSD of the atomic positions in Å of the G46 species simulations.

To assess how well the conformational space of the extrahelical orientations is explored, we have studied whether trajectories cross over into each other. For this, we compare the RMSD in Å for all extrahelical trajectories. All trajectories have been aligned along their backbone and for every frame in the  $E_1$  trajectory, we scanned the  $E_2$  and  $E_3$  trajectory for the frame with the lowest RMSD of r4CI compared to  $E_1$  (see Figures 45-51), i.e. the structure most closely resembling the  $E_1$  frame. Examples of crossing points are shown as well. We find that for every species at least 2 trajectories appear to cross over at some point suggesting that the conformational space is reasonably well explored. These trajectories also yield the best results in terms of their  $R_{DA}$  values suggesting further that the trajectories we feature are a good representation of the aptamer's structure.

The RMSD of the atomic positions for r4CI shows that  $E_2$  and  $E_3$  of the G6 species are geometrically similar. This is well represented in the two overlaid structures we show.

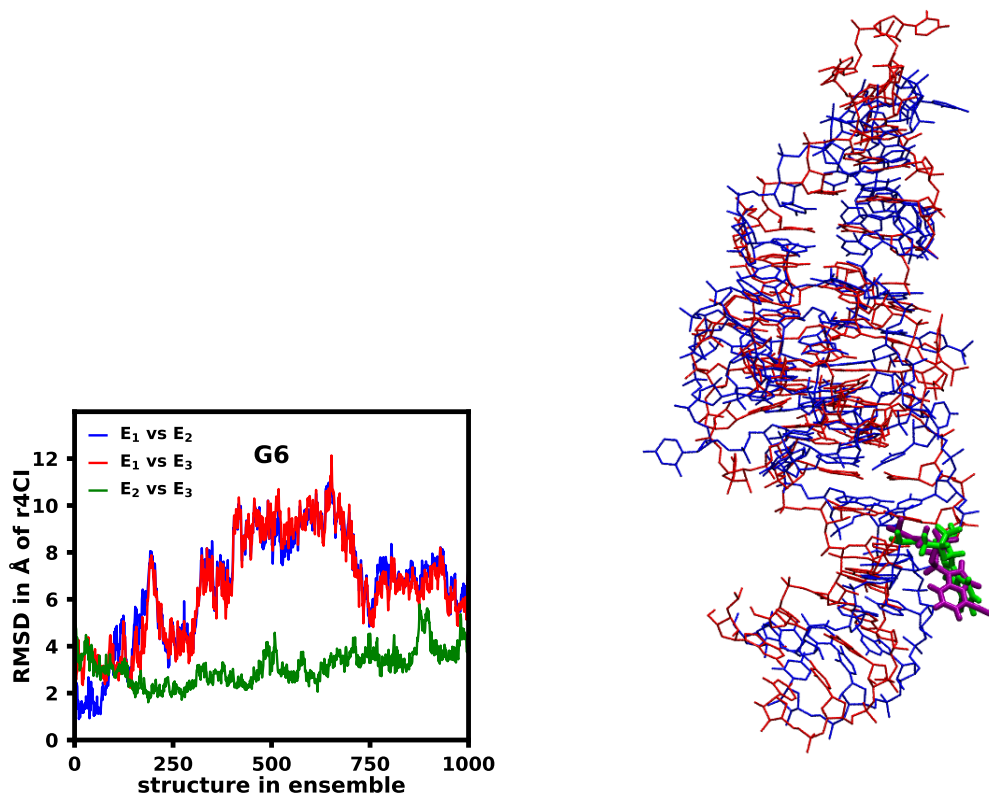

Figure 45: RMSD of the atomic positions in Å for r4CI in the G6 species simulations. The structural representation of structures 209 of  $E_2$  and  $E_3$ , shows that aside from the rotation of the cyanoindeole group, both structures are geometrically close.

The RMSD of the atomic positions for r4CI shows that  $E_1$  and  $E_2$  of the A11 species are geometrically similar. This is well represented in the two overlaid structures we show.

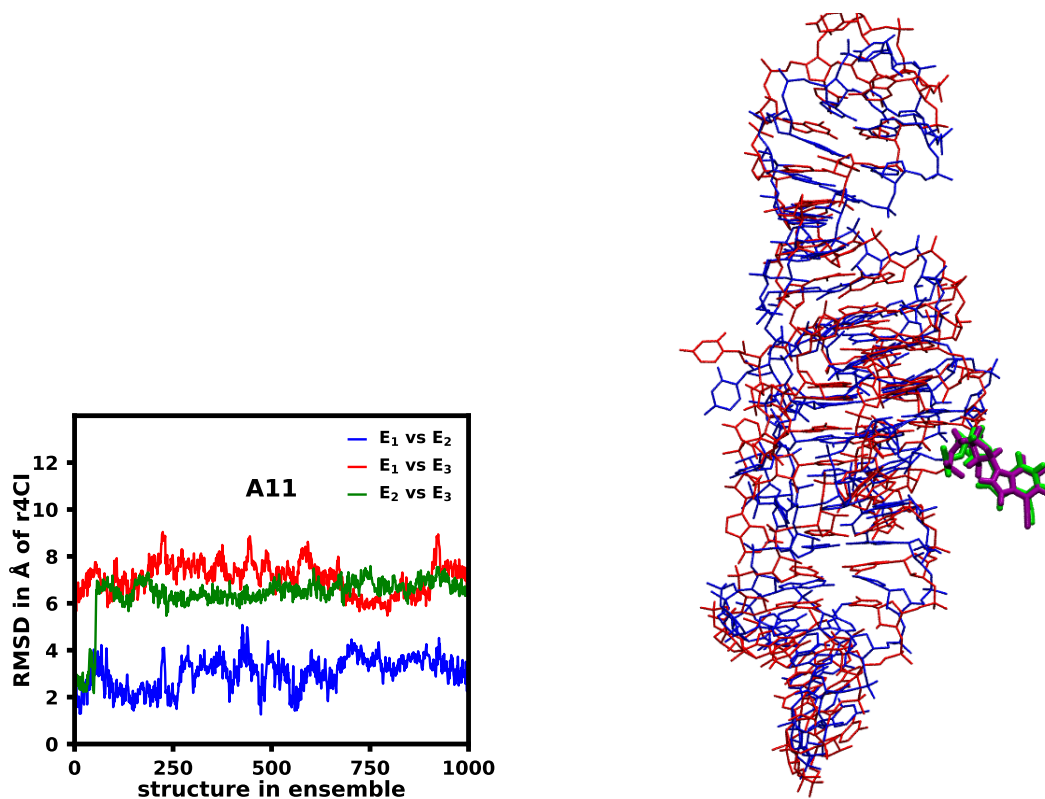

Figure 46: RMSD of the atomic positions in Å for r4CI in the A11 species simulations. The structural representation of structures 547 of  $E_1$  and  $E_2$ , shows that both structures are geometrically close.

The RMSD of the atomic positions for r4CI shows that  $E_1$ ,  $E_2$  and  $E_3$  of the G17 species are geometrically similar. This is well represented in the three overlaid structures we show.

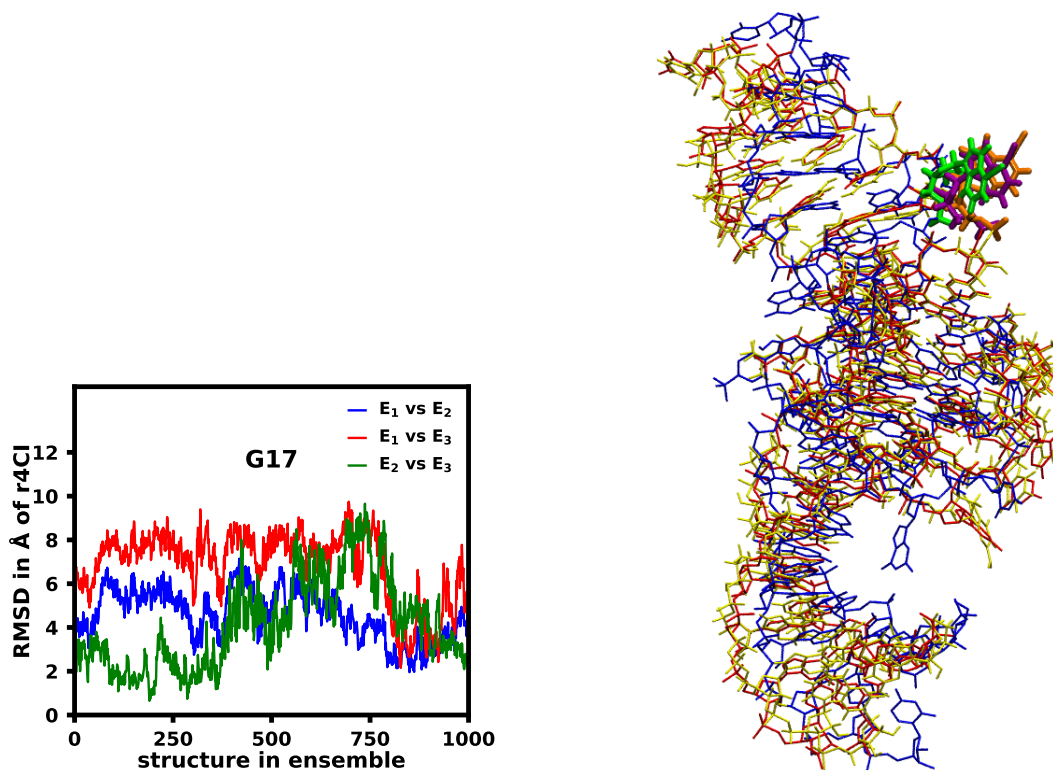

Figure 47: RMSD of the atomic positions in Å for r4CI in the G17 species simulations. The structural representation of structures 846 of  $E_1$ ,  $E_2$  and  $E_3$ , shows that all three structures are geometrically close.

The RMSD of the atomic positions for r4CI shows that  $E_1$ ,  $E_2$  and  $E_3$  of the U34 species are geometrically similar. This is well represented in the three overlaid structures we show.

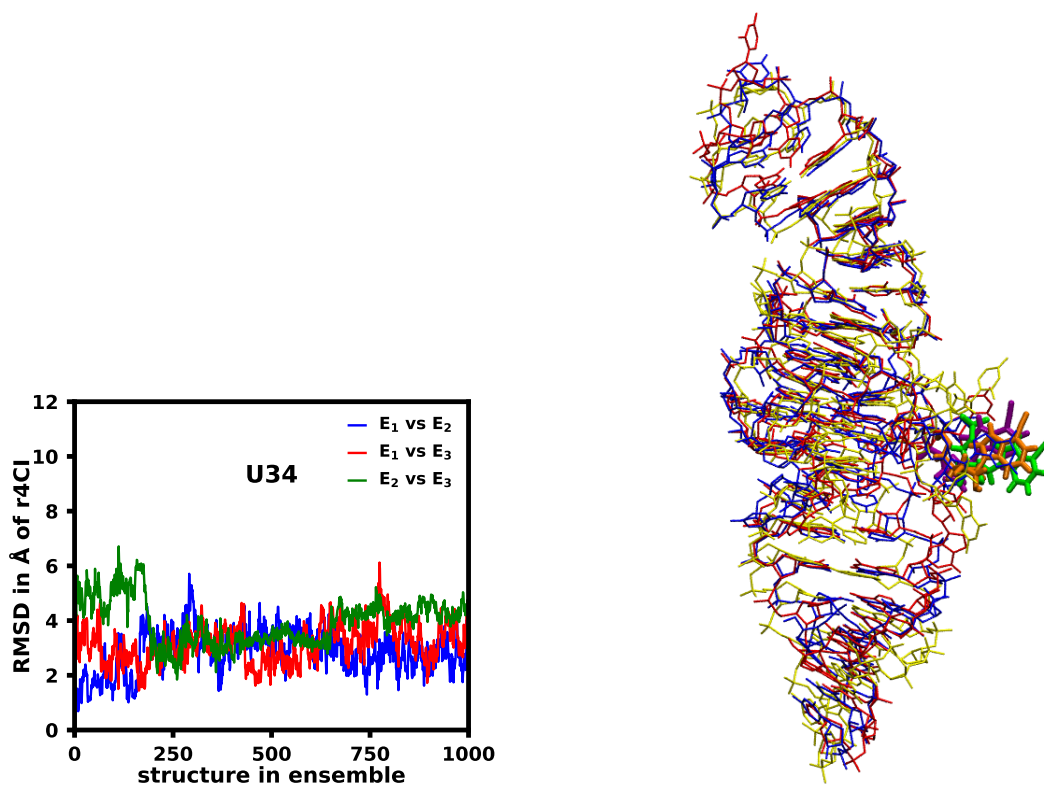

Figure 48: RMSD of the atomic positions in Å for r4CI in the U34 species simulations. The structural representation of structures 231 of  $E_1$ ,  $E_2$  and  $E_3$ , shows that all three structures are geometrically close.

The RMSD of the atomic positions for r4CI shows that  $E_1$ ,  $E_2$  and  $E_3$  of the G36 species are geometrically similar. This is well represented in the three overlaid structures we show.

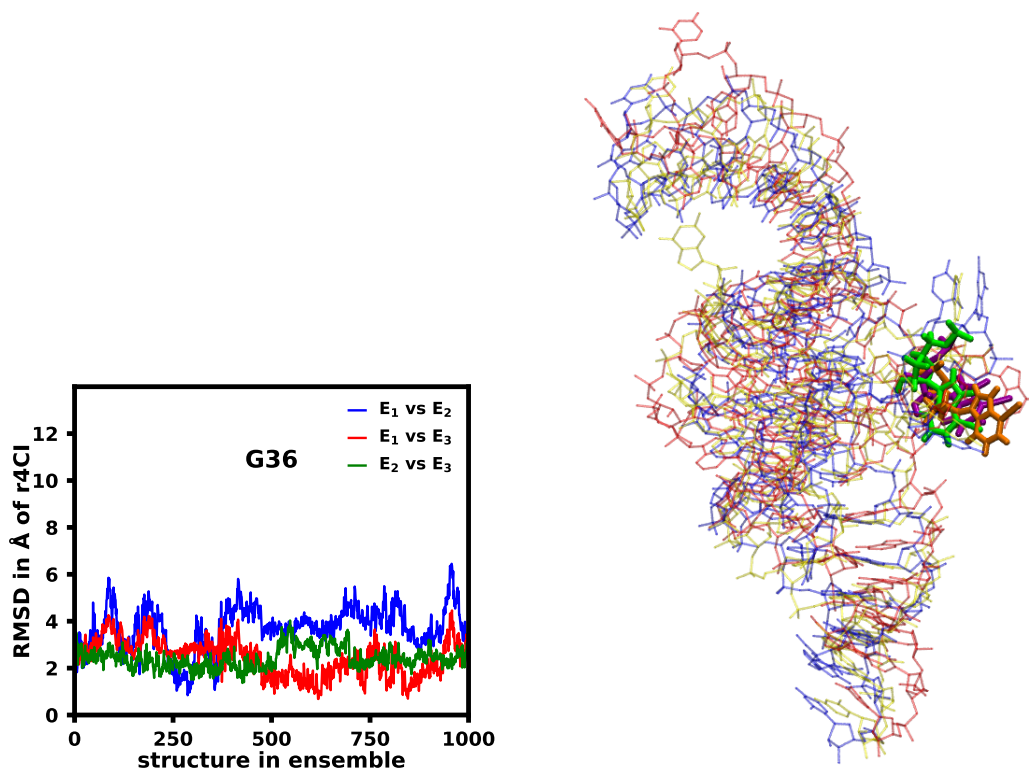

Figure 49: RMSD of the atomic positions in Å for r4CI in the G36 species simulations. The structural representation of structures 120 of  $E_1$ ,  $E_2$  and  $E_3$ , shows that all three structures are geometrically close.



The RMSD of the atomic positions for r4CI shows that  $E_2$  and  $E_3$  of the G45 species are geometrically similar. This is well represented in the two overlaid structures we show.

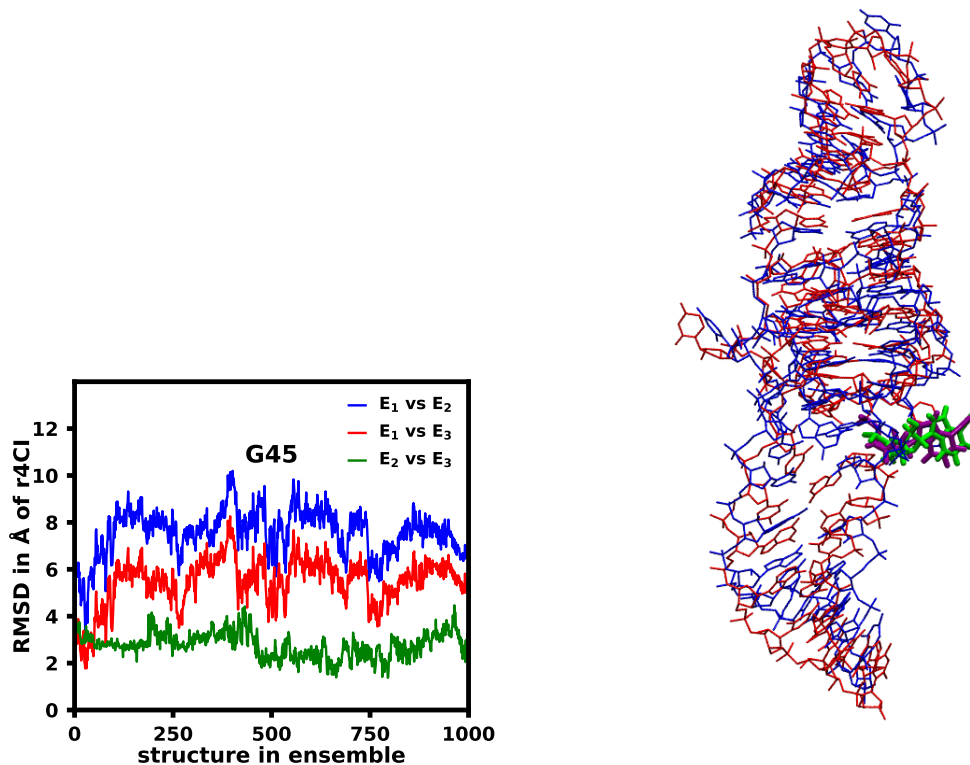

Figure 50: RMSD of the atomic positions in Å for r4CI in the G45 species simulations. The structural representation of structures 761 of  $E_2$  and  $E_3$ , shows that both structures are geometrically close.

The RMSD of the atomic positions for r4CI shows that  $E_1$  and  $E_2$  of the G46 species are geometrically similar. This is well represented in the two overlaid structures we show.

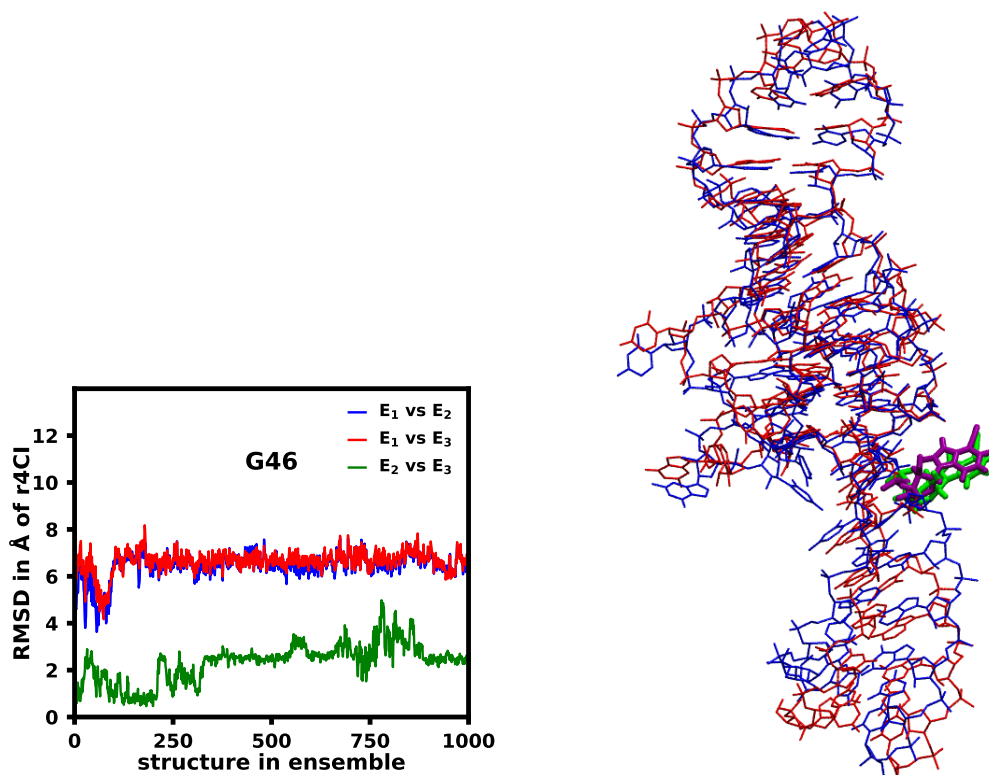

Figure 51: RMSD of the atomic positions in Å for r4CI in the G46 species simulations. The structural representation of structures 234 of  $E_2$  and  $E_3$ , shows that both structures are geometrically close.

# Chromophoric Distances

The chromophoric distances,  $R_{DA}$ , measured over the course of the MD simulations (MD, red) as well as derived from the exciton model (Exc., blue) for all simulations is shown for every simulation run. A summary of the average  $R_{DA}$  values for all simulations is shown in table: 1.

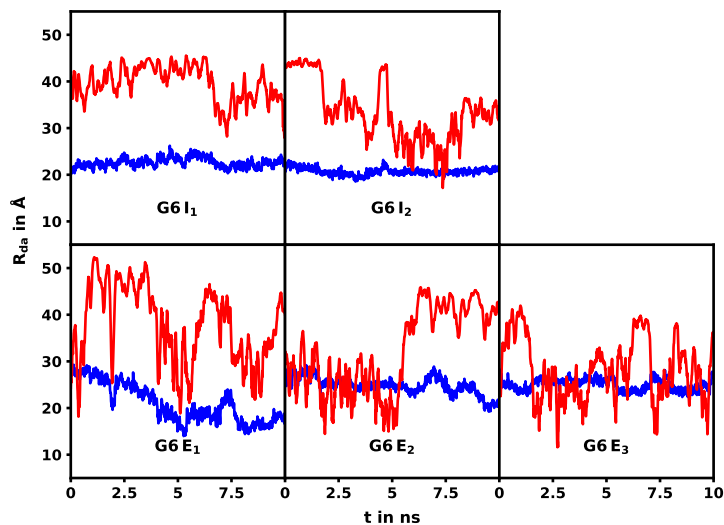

Figure 52:  $R_{DA}$  of the G6 species simulations.

Table 1: Spectroscopic data from FRET experiments as well as MD derived theoretical values. The best matches between experiment and simulations are marked with \*.

| Species     | Quantum yield | $E_{\tau}$ | $J^a$ | $R_0$ (Å) | $\kappa^2$ | $R_{DA}$ (Å) |      |
|-------------|---------------|------------|-------|-----------|------------|--------------|------|
|             |               |            |       |           |            | MD           | Exc. |
| G6 $I_1$    | 0.48          | 0.36       | 4.40  | 36.0      | 0.53       | 22.6         | 39.6 |
| G6 $I_2$    | 0.48          | 0.36       | 4.40  | 30.4      | 0.28       | 20.7         | 33.4 |
| G6 $E_1$    | 0.48          | 0.36       | 4.40  | 34.2      | 0.64       | 21.0         | 37.6 |
| G6 $E_2$    | 0.48          | 0.36       | 4.40  | 29.2      | 0.31       | 24.8         | 32.1 |
| G6 $E_3^*$  | 0.48          | 0.36       | 4.40  | 29.7      | 0.13       | 25.0         | 28.2 |
| A11 $I_1$   | 0.25          | 0.67       | 4.90  | 32.8      | 0.46       | 13.0         | 29.2 |
| A11 $I_2$   | 0.25          | 0.67       | 4.90  | 32.3      | 0.43       | 13.6         | 28.7 |
| A11 $E_1$   | 0.25          | 0.67       | 4.90  | 19.4      | 0.04       | 16.6         | 19.2 |
| A11 $E_2^*$ | 0.25          | 0.67       | 4.90  | 22.5      | 0.04       | 18.1         | 20.0 |
| A11 $E_3$   | 0.25          | 0.67       | 4.90  | 35.3      | 0.57       | 7.5          | 28.6 |
| G17 $I_1$   | 0.07          | 0.86       | 4.10  | 32.6      | 1.85       | 16.0         | 24.1 |
| G17 $I_2$   | 0.07          | 0.86       | 4.10  | 33.2      | 2.09       | 15.8         | 24.5 |
| G17 $E_1$   | 0.07          | 0.86       | 4.10  | 30.6      | 1.37       | 21.2         | 22.6 |
| G17 $E_2$   | 0.07          | 0.86       | 4.10  | 27.5      | 1.04       | 23.3         | 20.2 |
| G17 $E_3^*$ | 0.07          | 0.86       | 4.10  | 21.0      | 0.65       | 20.6         | 19.4 |
| U23 $E_1^*$ | 0.49          | 0.80       | 4.80  | 35.8      | 0.50       | 31.5         | 28.1 |
| U34 $I_1$   | 0.15          | 0.70       | 4.50  | 28.0      | 0.44       | 15.5         | 24.3 |
| U34 $I_2$   | 0.15          | 0.70       | 4.50  | 22.4      | 0.25       | 13.8         | 19.5 |
| U34 $E_1$   | 0.15          | 0.70       | 4.50  | 18.9      | 0.07       | 19.9         | 16.4 |
| U34 $E_2^*$ | 0.15          | 0.70       | 4.50  | 22.0      | 0.15       | 21.1         | 19.5 |
| U34 $E_3$   | 0.15          | 0.70       | 4.50  | 26.8      | 0.40       | 23.3         | 16.5 |
| G36 $I_1$   | 0.28          | 0.82       | 4.40  | 34.7      | 0.65       | 11.7         | 28.2 |
| G36 $I_2$   | 0.28          | 0.82       | 4.40  | 26.2      | 0.18       | 13.7         | 20.3 |
| G36 $E_1$   | 0.28          | 0.82       | 4.40  | 38.0      | 1.14       | 19.7         | 29.5 |
| G36 $E_2$   | 0.28          | 0.82       | 4.40  | 36.4      | 0.68       | 21.0         | 28.4 |
| G36 $E_3^*$ | 0.28          | 0.82       | 4.40  | 22.0      | 0.95       | 22.0         | 28.2 |
| G45 $I_1$   | 0.10          | 0.37       | 4.60  | 26.1      | 0.33       | 14.0         | 23.2 |
| G45 $I_2$   | 0.10          | 0.37       | 4.60  | 24.6      | 0.26       | 13.4         | 26.9 |
| G45 $E_1$   | 0.10          | 0.37       | 4.60  | 18.3      | 0.08       | 18.5         | 20.0 |
| G45 $E_2$   | 0.10          | 0.37       | 4.60  | 23.6      | 0.23       | 22.9         | 25.9 |
| G45 $E_3^*$ | 0.10          | 0.37       | 4.60  | 15.4      | 0.15       | 22.5         | 23.2 |
| G46 $I_1^*$ | 0.28          | 0.62       | 4.80  | 18.9      | 0.03       | 17.1         | 18.3 |
| G46 $I_2$   | 0.28          | 0.62       | 4.80  | 18.8      | 0.03       | 17.1         | 18.4 |
| G46 $E_1$   | 0.28          | 0.62       | 4.80  | 20.2      | 0.06       | 17.4         | 18.7 |
| G46 $E_2$   | 0.28          | 0.62       | 4.80  | 26.3      | 0.19       | 17.3         | 24.2 |
| G46 $E_3$   | 0.28          | 0.62       | 4.80  | 28.5      | 0.36       | 17.4         | 26.3 |

<sup>a</sup> $10^{14} \cdot l \cdot nm^4 \cdot cm^{-1} \cdot mol^{-1}$

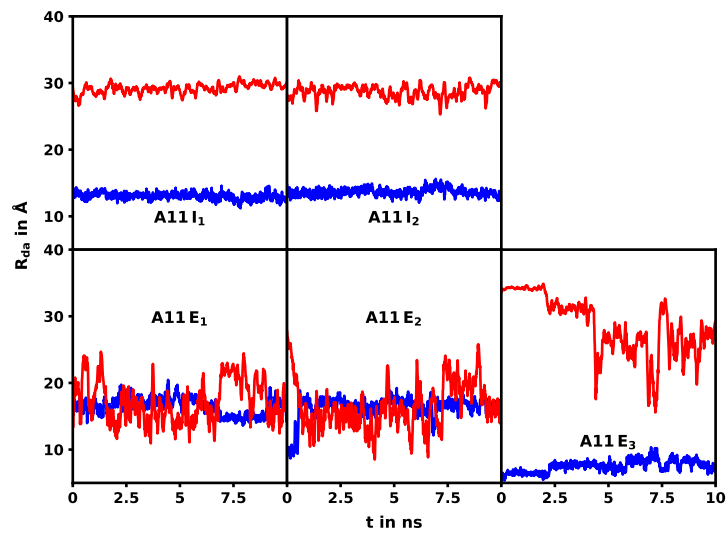

Figure 53:  $R_{DA}$  of the A11 species simulations.

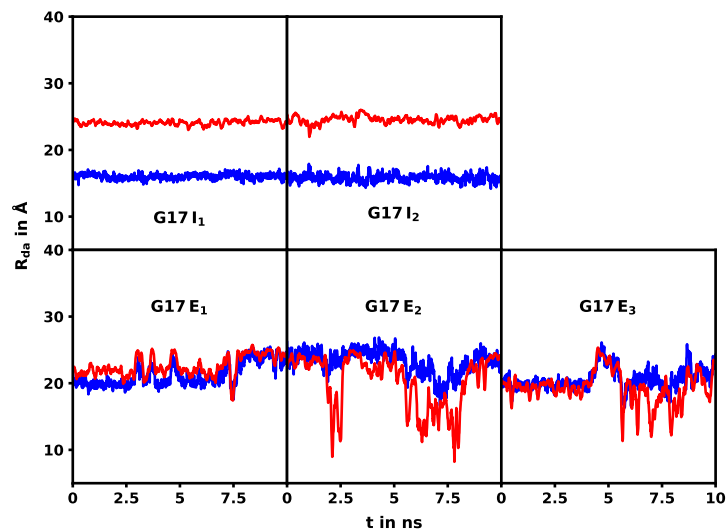

Figure 54:  $R_{DA}$  of the G17 species simulations.

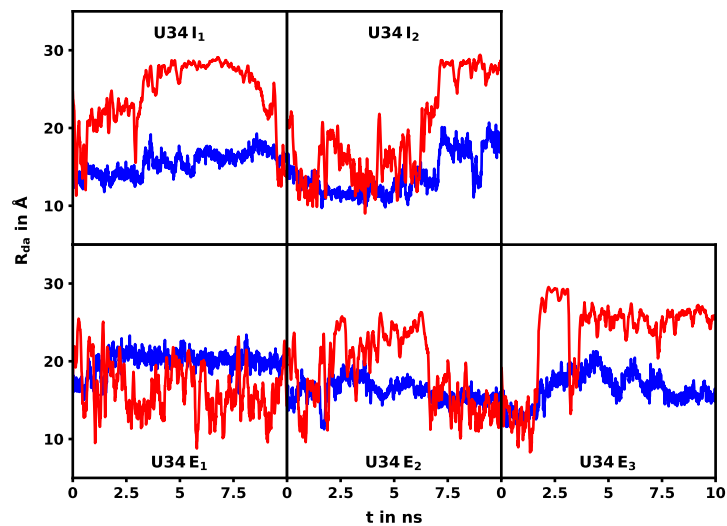

Figure 55:  $R_{DA}$  of the U34 species simulations.

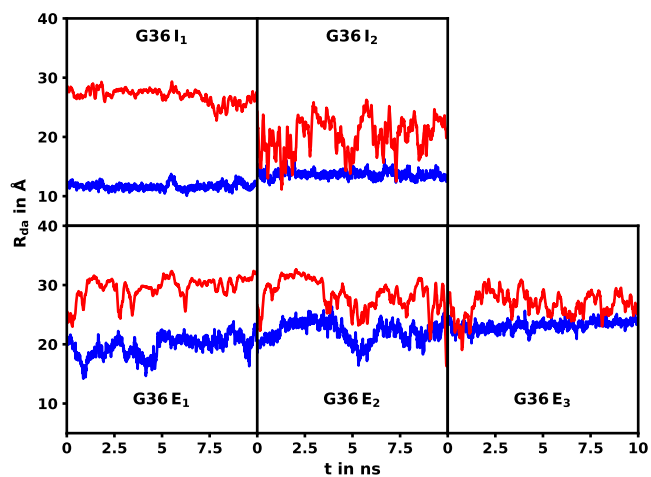

Figure 56:  $R_{DA}$  of the G36 species simulations.

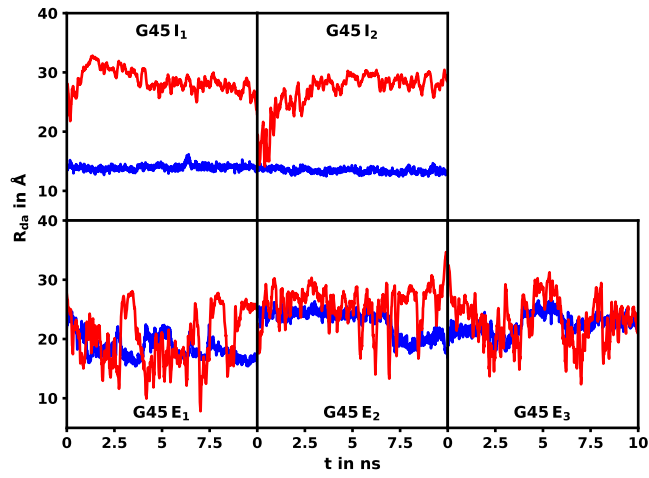

Figure 57:  $R_{DA}$  of the G45 species simulations.

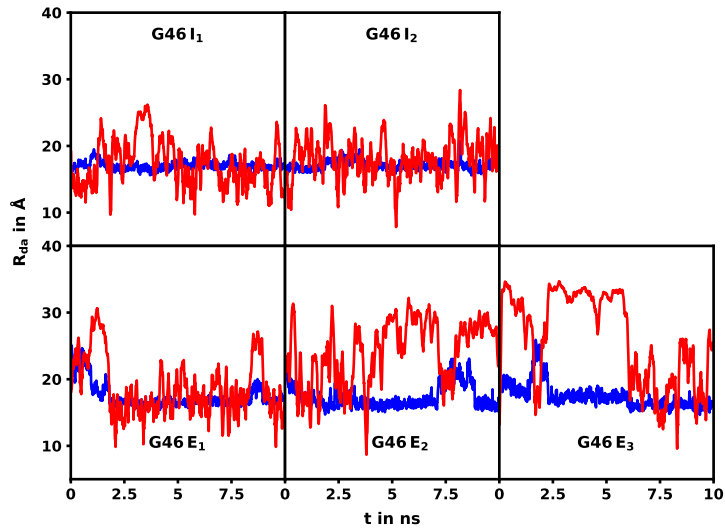

Figure 58:  $R_{DA}$  of the G46 species simulations.
